# Supplementary material for: Potential Markers of Progression in Idiopathic Parkinson’s Disease Derived From Assessment of Circular Gait With a Single Body-Fixed-Sensor: A 5 Year Longitudinal Study
Source: Front Hum Neurosci. 2019 Feb 19;13:59. doi: 10.3389/fnhum.2019.00059 (PMC6389786; doi:10.3389/fnhum.2019.00059)
Supplement: Supplementary file 2 [file Data_Sheet_2.xlsx]

## Sheet: Table B.1 Always present
	GEE models (Different stages of PD vs HC) PARTICIPANTS PRESENT ALL 5 YEARS		Early-PD vs HC											GEE models (Different stages of PD vs HC) PARTICIPANTS PRESENT ALL 5 YEARS		Mid-PD vs HC
			TIME			GROUP			TIME x GROUP			Confounders				TIME			GROUP			TIME x GROUP			Confounders
			Beta	SE	p	Beta	SE	p	Beta	SE	p					Beta	SE	p	Beta	SE	p	Beta	SE	p
	FEATURES	Number of steps	0.0231805	0.0150441	0.123356	0.0952318	0.256604	0.710545	0.0536335	0.0233283	0.0215007	a		FEATURES	Number of steps	0.0168785	0.0104483	0.106217	0.621809	0.150042	3.40968e-05	-0.00674536	0.0352221	0.848126	a
		Total duration	-0.00159053	0.0468254	0.972903	0.454407	0.356736	0.202738	0.110134	0.0629171	0.0800398	b*			Total duration	-0.0192514	0.0312976	0.538483	0.769128	0.269091	0.00425984	0.0791529	0.108555	0.465911	b*
		Asymmetry of step time	-0.00165334	0.0601376	0.978067	-0.343377	0.310992	0.269536	0.15589	0.0957554	0.103524	a/b			Asymmetry of step time	-0.00235354	0.0607357	0.969089	0.501817	0.294088	0.087943	0.0392836	0.0892085	0.659679	a/b
		Median stride time	-0.0100759	0.0194552	0.604528	-0.257626	0.338382	0.44645	-0.101283	0.027882	0.000280615	a			Median stride time	0.00949101	0.0260209	0.715301	-0.146311	0.30907	0.635935	-0.0800578	0.05624	0.15459	a
		Stride time variability	-0.0371872	0.0698196	0.594298	0.294592	0.307322	0.337772	-0.00878836	0.0919493	0.923856	a			Stride time variability	-0.0284337	0.0704992	0.686713	-0.130582	0.270755	0.629601	0.238741	0.0795902	0.00270307	a/c
		SD (VT)	0.0159221	0.011805	0.177414	-0.233654	0.194784	0.230313	-0.00864355	0.0207915	0.67761	a			SD (VT)	-0.000466796	0.0166282	0.977604	-0.666459	0.273685	0.0148864	0.0260286	0.0314045	0.407208	a		Legend of confounders
		SD (ML)	0.0451625	0.0358791	0.208124	0.112372	0.31408	0.720507	0.0235686	0.0397359	0.553094	a/b			SD (ML)	0.0613674	0.0370332	0.097501	-0.146245	0.250029	0.558607	0.0127361	0.0545722	0.815466	a/b		a	Gait speed
		SD (AP)	0.0527767	0.0201135	0.00869194	-0.209259	0.247616	0.398057	0.00544937	0.0324904	0.866802	a			SD (AP)	0.0752701	0.0249454	0.00254954	-0.719104	0.206781	0.000505901	0.0527589	0.045851	0.249872	a/b		b	Age
		Stride regularity (VT)	-0.0510753	0.0359972	0.155938	-0.723678	0.337802	0.0321683	-0.00403279	0.0718689	0.955252				Stride regularity (VT)	-0.0316913	0.0326247	0.331355	0.396701	0.192476	0.0392988	-0.200702	0.0731863	0.00610029	a		c	ON/OFF medication stage
		Step regularity (VT)	-0.187475	0.15855	0.237033	-0.101066	0.190912	0.59654	0.120855	0.146496	0.409387	b			Step regularity (VT)	-0.157117	0.146985	0.285099	-0.240505	0.172177	0.16246	0.0930979	0.149173	0.532565
		Stride regularity (AP)	-0.0914127	0.025423	0.000323563	-0.776854	0.329392	0.0183513	-0.0253863	0.0853006	0.766001	a			Stride regularity (AP)	-0.104341	0.0366089	0.00436957	-0.297591	0.279114	0.286333	-0.187844	0.0637274	0.0032023
		Step regularity (AP)	-0.099619	0.0644829	0.122373	-0.459423	0.303898	0.130593	0.00174476	0.0646398	0.978466	a			Step regularity (AP)	-0.140615	0.113433	0.215111	-0.278709	0.237338	0.240269	0.0732255	0.119478	0.539958			Legend of colors
		Harmonic ratio (VT)	0.0513397	0.0298092	0.0850191	-0.0467341	0.337177	0.889763	-0.176076	0.0469729	0.000177919				Harmonic ratio (VT)	0.0487744	0.0261622	0.0622788	-0.444787	0.285248	0.118925	-0.134413	0.0428395	0.00170344	a		Results
		Harmonic ratio (ML)	-0.0509977	0.0231259	0.0274384	0.198134	0.322972	0.539565	-0.152852	0.0484744	0.00161459				Harmonic ratio (ML)	-2.03848e-05	0.0342122	0.999525	-0.31296	0.310204	0.313029	0.0837185	0.0634611	0.187099	a/b			Significant results with p < .05
		Harmonic ratio (AP)	-0.0880002	0.0408122	0.0310662	-0.287203	0.324019	0.375415	-0.117475	0.0690921	0.0890796	b			Harmonic ratio (AP)	-0.0506401	0.0408117	0.214671	-0.841699	0.347638	0.0154695	0.0631577	0.0771167	0.412793	a		Criteria for progression markers
		Index of harmonicity (VT)	0.0932665	0.044284	0.0351957	0.41366	0.269495	0.124797	-0.14532	0.0778144	0.0618299				Index of harmonicity (VT)	0.0467456	0.0543038	0.389339	0.872169	0.316837	0.00590997	-0.115249	0.0727291	0.11305	a/b			Significant results with p < .05 (expected direction)
		Index of harmonicity (ML)	-0.00306057	0.0519229	0.952996	0.0313803	0.341124	0.926705	0.0537774	0.0629344	0.392828	a			Index of harmonicity (ML)	0.000692104	0.0681119	0.991893	0.204593	0.353859	0.563145	-0.067596	0.0877847	0.441288	a			Significant results with p < .05 (unexpected direction)
		Index of harmonicity (AP)	-0.0459187	0.0377398	0.223711	0.0467442	0.316679	0.882653	0.078545	0.0620667	0.205695	a			Index of harmonicity (AP)	-0.102572	0.0470908	0.029393	0.278416	0.292712	0.341522	0.0471636	0.044309	0.287136	b			Results with trend, p < .1 (expected direction)
		Normalized peak power (VT)	0.0410037	0.061123	0.502323	-0.143223	0.320404	0.654868	-0.122448	0.0794372	0.123208				Normalized peak power (VT)	0.00247109	0.0627576	0.968591	0.575153	0.263973	0.0293443	-0.208851	0.0709613	0.00324868	a/b/c			Results with trend, p < .1 (unexpected direction)
		Normalized peak power (ML)	-0.0397458	0.0451739	0.378946	-0.309392	0.335336	0.356199	-0.0679526	0.0559577	0.224612				Normalized peak power (ML)	0.0134318	0.0532116	0.800714	-0.616793	0.273799	0.0242767	0.0149075	0.0857714	0.862018	b			Results with trend, p < .05 (opposite direction from Early-PD vs HC)
		Normalized peak power (AP)	-0.113817	0.0325482	0.000470733	-0.481609	0.30798	0.117873	-0.0949724	0.0603793	0.115735	a			Normalized peak power (AP)	-0.11056	0.0355956	0.0018963	-0.0467248	0.312116	0.880999	-0.0646996	0.064945	0.319142				Results with trend, p < .1 (opposite direction from Early-PD vs HC)
		Width of peak power (VT)	-0.00104115	0.0482266	0.982776	0.953135	0.231041	3.70111e-05	0.0140393	0.088912	0.874534				Width of peak power (VT)	-0.0278417	0.0406813	0.493732	0.887028	0.194266	4.97014e-06	0.155075	0.083658	0.0637848	b
		Width of peak power (ML)	0.0969394	0.0808744	0.230667	0.433309	0.247751	0.0802962	-0.0404783	0.101221	0.68923				Width of peak power (ML)	0.122937	0.101305	0.224925	0.88429	0.334634	0.00822827	-0.153783	0.126427	0.223842	a
		Width of peak power (AP)	0.0263688	0.0293683	0.369255	0.642871	0.314367	0.0408579	-0.0888268	0.0848367	0.295084	c			Width of peak power (AP)	0.033673	0.0399911	0.399781	-0.172312	0.269542	0.522642	0.151332	0.0965213	0.116914	a
		Gait-UPDRS III	0.0557927	0.0501989	0.266383	0.936688	0.283268	0.000943971	0.183234	0.067265	0.00644844	c			Gait-UPDRS III	0.0481885	0.0433572	0.266383	1.55246	0.273095	1.31066e-08	0.00237217	0.0658952	0.971283

## Sheet: Table B.2 Biannual visits
	GEE models (Different stages of PD vs HC) BIANNUAL VISITS		Early-PD vs HC											GEE models (Different stages of PD vs HC) BIANNUAL VISITS		Mid-PD vs HC
			TIME			GROUP			TIME x GROUP			Confounders				TIME			GROUP			TIME x GROUP			Confounders
			Beta	SE	p	Beta	SE	p	Beta	SE	p					Beta	SE	p	Beta	SE	p	Beta	SE	p
	FEATURES	Number of steps	0.0129733	0.00695292	0.0620585	0.212859	0.192098	0.267829	0.0292999	0.0104558	0.00507452	a		FEATURES	Number of steps	0.00914998	0.00478795	0.0559991	0.524272	0.134238	9.40155e-05	-0.0106365	0.0149652	0.477237	a
		Total duration	0.00947192	0.0182607	0.603967	0.797835	0.242885	0.00102046	0.0439525	0.0237915	0.0646881	b*			Total duration	-0.0112205	0.0119023	0.345827	0.836455	0.219006	0.000133822	0.0367095	0.0460911	0.425767	b*
		Asymmetry of step time	-0.0310488	0.0262407	0.236717	-0.0582877	0.22276	0.793583	0.0666294	0.0345719	0.0539462	a/b			Asymmetry of step time	-0.0441645	0.0250853	0.0783101	0.340527	0.188552	0.0709166	0.0451095	0.0357691	0.207262	a
		Median stride time	-0.00571998	0.0152009	0.481521	-0.351279	0.217985	0.176751	-0.0519084	0.0288411	8.36053e-05	a			Median stride time	0.00615342	0.0152005	0.563165	-0.114788	0.176017	0.619071	-0.0332184	0.0276878	0.211512	a
		Stride time variability	0.00127499	0.0191498	0.946916	0.463959	0.215227	0.0311092	-0.022361	0.029699	0.451498	a			Stride time variability	0.00231066	0.0197954	0.907076	-0.00434659	0.189393	0.98169	0.0789666	0.025318	0.00181474	a/c
		SD (VT)	0.00997188	0.00606107	0.0999213	0.0305533	0.152547	0.841255	0.00152816	0.0109795	0.889305	a			SD (VT)	-0.000292003	0.00696589	0.966563	-0.474797	0.214832	0.0270995	0.0139308	0.0133258	0.295838	a		Legend of confounders
		SD (ML)	0.0252041	0.0144727	0.0815968	0.0486627	0.206162	0.813401	0.00574316	0.017305	0.739981	a/b			SD (ML)	0.0186133	0.0134782	0.167281	-0.200111	0.210142	0.340963	-0.00505502	0.0211198	0.810835	a/b		a	Gait speed
		SD (AP)	0.0230789	0.00828996	0.00536997	-0.0399252	0.17914	0.823635	-0.00545671	0.0155028	0.724851	a/c			SD (AP)	0.0297286	0.00980141	0.00242061	-0.564996	0.200057	0.00474026	0.0223456	0.0171312	0.192103	a/b/c		b	Age
		Stride regularity (VT)	-0.0309127	0.0164757	0.0606193	-0.343739	0.227451	0.130721	-0.0160572	0.0228115	0.481492				Stride regularity (VT)	-0.0301329	0.0162342	0.0634342	0.427148	0.196526	0.0297431	-0.0720847	0.0341676	0.0348806	a/b/c		c	ON/OFF medication stage
		Step regularity (VT)	-0.0751096	0.0477433	0.115674	-0.0918785	0.157668	0.560073	0.0366838	0.0471007	0.436076	b			Step regularity (VT)	-0.0599024	0.046278	0.195526	-0.204079	0.170751	0.232015	0.0492679	0.0513665	0.337486	a
		Stride regularity (AP)	-0.0449095	0.0116849	0.000121353	-0.894209	0.238798	0.000180659	-0.0166027	0.0264923	0.530857	a			Stride regularity (AP)	-0.0474162	0.0159684	0.00298414	-0.546496	0.208651	0.00881401	-0.064996	0.02954	0.0277877
		Step regularity (AP)	-0.0470853	0.0221095	0.0332012	-0.443696	0.228217	0.0518734	0.00589283	0.0271532	0.828192	a			Step regularity (AP)	-0.0431256	0.0258154	0.094813	-0.326794	0.191257	0.0875136	0.0229439	0.0359328	0.523134			Legend of colors
		Harmonic ratio (VT)	-0.00171044	0.0122043	0.88854	-0.21382	0.171932	0.213635	-0.0428147	0.0227928	0.0603224	b/c			Harmonic ratio (VT)	0.0165097	0.0147031	0.261492	-0.475945	0.186456	0.0106926	-0.044051	0.0249055	0.0769395	a		Results
		Harmonic ratio (ML)	-0.0180678	0.00979359	0.0650581	-0.199681	0.161497	0.216295	-0.0549878	0.0243239	0.0237808				Harmonic ratio (ML)	-0.000215274	0.0130928	0.986882	-0.602939	0.218616	0.00581599	0.0356714	0.0235235	0.129414	a/b			Significant results with p < .05
		Harmonic ratio (AP)	-0.0192032	0.0128499	0.135065	-0.347428	0.160633	0.0305516	-0.0443211	0.0291662	0.12861	b			Harmonic ratio (AP)	-0.00690225	0.0166963	0.679313	-0.760598	0.20628	0.000226727	0.0138407	0.0300407	0.644991	a		Criteria for progression markers
		Index of harmonicity (VT)	0.0104402	0.010162	0.304242	0.238583	0.0868393	0.00600679	-0.0539469	0.0315062	0.0868484				Index of harmonicity (VT)	0.0190746	0.0214337	0.373502	0.849755	0.237923	0.00035487	-0.0545895	0.0314852	0.0829513	a/b			Significant results with p < .05 (expected direction)
		Index of harmonicity (ML)	0.00158309	0.0261617	0.951748	0.287118	0.272834	0.292638	0.0324473	0.0314951	0.3029	a			Index of harmonicity (ML)	0.00459827	0.0269812	0.864676	0.216755	0.263493	0.410724	-0.0313447	0.0340145	0.356784	a			Significant results with p < .05 (unexpected direction)
		Index of harmonicity (AP)	-0.0121688	0.0137073	0.374671	-0.118795	0.226437	0.599843	0.0328371	0.0290367	0.258105	a/c			Index of harmonicity (AP)	-0.023231	0.0151104	0.12419	0.441572	0.20923	0.0348184	0.00822544	0.0185637	0.657698	b			Results with trend, p < .1 (expected direction)
		Normalized peak power (VT)	-0.0131956	0.0238436	0.579973	0.246327	0.221265	0.265592	-0.063102	0.0323659	0.0512182	b			Normalized peak power (VT)	-0.00662635	0.0228607	0.771926	0.549397	0.185369	0.00303872	-0.0684832	0.0294418	0.0200157	a/b/c			Results with trend, p < .1 (unexpected direction)
		Normalized peak power (ML)	-0.0217891	0.0166903	0.191725	-0.397099	0.265244	0.134365	-0.00385828	0.0239179	0.871846	a			Normalized peak power (ML)	-0.00183715	0.0204715	0.928493	-0.565786	0.216115	0.0088449	0.0199198	0.0349772	0.569011	b			Results with trend, p < .05 (opposite direction from Early-PD vs HC)
		Normalized peak power (AP)	-0.0522878	0.0128897	4.98017e-05	-0.558375	0.248914	0.024881	-0.0326246	0.0255934	0.202406	a			Normalized peak power (AP)	-0.0521033	0.0145445	0.000340537	-0.180516	0.202697	0.37316	-0.0190249	0.0300059	0.526055				Results with trend, p < .1 (opposite direction from Early-PD vs HC)
		Width of peak power (VT)	0.0219491	0.0244418	0.369178	0.791663	0.170118	3.26183e-06	0.00829997	0.0355626	0.815458				Width of peak power (VT)	0.00362174	0.0186729	0.84621	0.649074	0.166315	9.51329e-05	0.0102845	0.032811	0.753942	a/b
		Width of peak power (ML)	0.0473004	0.0323162	0.143282	0.327048	0.168826	0.0527217	-0.0186056	0.0400834	0.642524				Width of peak power (ML)	0.0460013	0.0346736	0.184609	0.436024	0.188046	0.0204108	-0.0595031	0.0430675	0.167087	a/b
		Width of peak power (AP)	0.0174769	0.0169692	0.303049	0.59179	0.246111	0.0161917	-0.0208955	0.0311632	0.502526	a/c			Width of peak power (AP)	0.0125629	0.018888	0.50597	-0.0837244	0.165272	0.612446	0.0501229	0.0415167	0.227319
		Gait-UPDRS III	0.0352141	0.0346441	0.309414	0.96955	0.243302	6.74907e-05	0.0869397	0.0383207	0.0232842	c			Gait-UPDRS III	0.00373878	0.030291	0.901768	1.40965	0.295821	1.88665e-06	0.00109822	0.0408653	0.97856	b

## Sheet: Table B.3 Differences
	GEE models (Different stages of PD vs HC) FEATURES ABSOLUTE DIFFERENCE: CW - CCW		Early-PD vs HC											GEE models (Different stages of PD vs HC) FEATURES ABSOLUTE DIFFERENCE: CW - CCW		Mid-PD vs HC
			TIME			GROUP			TIME x GROUP			Confounders				TIME			GROUP			TIME x GROUP			Confounders
			Beta	SE	p	Beta	SE	p	Beta	SE	p					Beta	SE	p	Beta	SE	p	Beta	SE	p
	FEATURES	Number of steps	0.0710767	0.0682596	0.29775	0.279013	0.169362	0.0994682	-0.106528	0.0909437	0.241454	a		FEATURES	Number of steps	0.0655778	0.0733567	0.371344	0.413176	0.187126	0.0272432	-0.0780311	0.094753	0.410212	a
		Total duration	-0.0222431	0.0885729	0.801715	0.0376446	0.239411	0.875057	0.132786	0.103679	0.200283				Total duration	-0.0565673	0.0831885	0.496511	0.404131	0.205781	0.0495431	0.00201448	0.104564	0.984629	b*
		Asymmetry of step time	-0.0730592	0.0596873	0.22094	-0.0917768	0.21422	0.668343	0.170732	0.0862907	0.0478644				Asymmetry of step time	-0.0757771	0.0619787	0.221469	0.373525	0.201052	0.0631901	0.04243	0.0960662	0.658725
		Median stride time	-0.000205732	0.0266804	0.993848	-0.197213	0.225285	0.381361	0.0719844	0.0697571	0.302105				Median stride time	-0.000260568	0.0293168	0.992908	-0.121314	0.212144	0.567425	0.0603094	0.0708846	0.394874
		Stride time variability	-0.0813404	0.085986	0.344162	0.184128	0.208439	0.377038	-0.0076069	0.103097	0.941182				Stride time variability	-0.0839029	0.0888277	0.344885	0.244404	0.218692	0.26375	0.0787099	0.101822	0.439512	c
		SD (VT)	0.0238347	0.0563485	0.672304	-0.443967	0.242979	0.0676727	-0.0403694	0.0755359	0.593038	a/b			SD (VT)	0.00101723	0.0660681	0.987716	-0.426069	0.252767	0.0918695	-0.0790942	0.111257	0.477138	a		Legend of confounders
		SD (ML)	0.0440334	0.0564201	0.435123	-0.159373	0.218343	0.46544	-0.100772	0.0731204	0.168152	a/b			SD (ML)	0.0409123	0.0570558	0.473338	-0.362638	0.223368	0.104482	-0.0753475	0.0893362	0.398997	a/b		a	Gait speed
		SD (AP)	0.0414252	0.0561559	0.460708	-0.185628	0.211169	0.379374	-0.0235071	0.0763309	0.758111	a			SD (AP)	0.0598126	0.0601442	0.319985	-0.123085	0.212314	0.562094	-0.14629	0.088058	0.0966548	a/b		b	Age
		Stride regularity (VT)	-0.0268611	0.0840368	0.749245	-0.171726	0.180892	0.342454	0.00654271	0.121357	0.957005				Stride regularity (VT)	-0.0320875	0.101214	0.751223	-0.125198	0.206917	0.545136	0.106255	0.117856	0.367288			c	ON/OFF medication stage
		Step regularity (VT)	-0.0125303	0.0709463	0.85981	-0.532939	0.228813	0.0198511	0.0853467	0.089085	0.338045	a/b			Step regularity (VT)	-0.0487032	0.0620129	0.432235	0.0840808	0.2149	0.695608	-0.0107664	0.0854465	0.899731
		Stride regularity (AP)	0.134281	0.0713207	0.0597296	0.0124732	0.195153	0.949038	-0.159847	0.104409	0.125777	b			Stride regularity (AP)	0.14294	0.084803	0.0918813	0.0217856	0.19264	0.90996	-0.0879203	0.116992	0.452349
		Step regularity (AP)	0.0863523	0.0479553	0.0717526	0.371423	0.196296	0.0584693	-0.157025	0.0876789	0.0733085				Step regularity (AP)	0.0802795	0.0452845	0.0762647	0.254257	0.217875	0.243218	-0.103348	0.0805019	0.199215			Legend of colors
		Harmonic ratio (VT)	-0.0520477	0.0629471	0.408323	-0.278576	0.21345	0.191854	0.0229729	0.0953664	0.80964				Harmonic ratio (VT)	-0.0548547	0.0654065	0.401653	-0.349261	0.21005	0.0963619	0.033139	0.0912736	0.71655			Results
		Harmonic ratio (ML)	0.0674414	0.091173	0.459477	0.126243	0.265392	0.634299	-0.136692	0.10514	0.19357	a			Harmonic ratio (ML)	0.0621724	0.0902273	0.490783	-0.148709	0.241665	0.538322	0.025615	0.105509	0.808179	a/b			Significant results with p < .05
		Harmonic ratio (AP)	-0.0436361	0.0742381	0.556676	-0.550384	0.250499	0.0280099	0.117075	0.106787	0.272932				Harmonic ratio (AP)	-0.0481883	0.0836872	0.56474	-0.502988	0.208551	0.0158728	0.0962845	0.101672	0.343632			Criteria for progression markers
		Index of harmonicity (VT)	-0.0240782	0.0436494	0.581203	-0.397346	0.239243	0.0967448	0.0960616	0.0780137	0.218195				Index of harmonicity (VT)	-0.0285486	0.0530697	0.590615	0.0553066	0.218548	0.800219	-0.033384	0.0706187	0.636401	a			Significant results with p < .05 (expected direction)
		Index of harmonicity (ML)	0.0497022	0.040549	0.2203	0.0922871	0.226937	0.684255	0.0612596	0.067422	0.363561				Index of harmonicity (ML)	0.00904928	0.0440708	0.83731	0.396401	0.211355	0.0607207	-0.0799031	0.0663709	0.228633	b			Significant results with p < .05 (unexpected direction)
		Index of harmonicity (AP)	-0.0413659	0.0634662	0.514544	-0.353309	0.231987	0.127765	0.243448	0.0899237	0.00678392				Index of harmonicity (AP)	-0.0902857	0.0611069	0.139541	-0.206941	0.195289	0.289298	0.0795674	0.0811949	0.327108	b			Results with trend, p < .1 (expected direction)
		Normalized peak power (VT)	0.0525839	0.0641702	0.412533	0.015562	0.212421	0.941599	-0.143288	0.107134	0.181068	a			Normalized peak power (VT)	0.061311	0.0746248	0.411311	0.189417	0.226503	0.403004	-0.151833	0.101621	0.135146	a			Results with trend, p < .1 (unexpected direction)
		Normalized peak power (ML)	0.0301081	0.0614047	0.623906	-0.263749	0.251696	0.29469	-0.000342236	0.109899	0.997515	a			Normalized peak power (ML)	0.0297542	0.0684642	0.663856	-0.0466068	0.232266	0.840964	-0.0933264	0.101779	0.359169	a			Results with trend, p < .05 (opposite direction from Early-PD vs HC)
		Normalized peak power (AP)	0.0299182	0.0679982	0.659947	0.0436011	0.236934	0.853996	-0.0563604	0.0911051	0.53616	a			Normalized peak power (AP)	0.0333411	0.0823488	0.685569	0.324245	0.228559	0.156001	-0.104861	0.101805	0.303003				Results with trend, p < .1 (opposite direction from Early-PD vs HC)
		Width of peak power (VT)	-0.0169404	0.0748903	0.821044	0.439286	0.211278	0.0376002	0.00274768	0.10465	0.979053	a/c			Width of peak power (VT)	-0.0103546	0.0721762	0.885925	0.250182	0.217836	0.250767	0.0202309	0.0905073	0.823125	a
		Width of peak power (ML)	0.135316	0.0569722	0.0175427	0.382023	0.209087	0.0676843	-0.104082	0.0922073	0.25899				Width of peak power (ML)	0.158971	0.0677665	0.0189833	0.648157	0.2166	0.00276781	-0.147448	0.086822	0.0894561	c
		Width of peak power (AP)	0.0778589	0.05708	0.172558	0.40752	0.233948	0.0815221	-0.00395626	0.0884112	0.964308	c			Width of peak power (AP)	0.0698557	0.053098	0.188308	-0.183167	0.210086	0.383281	-0.0197431	0.0936874	0.833095	a

## Sheet: Table B.4 Lat affected inside
	GEE models (Different stages of PD vs HC) DIRECTION OF CIRCULAR TRAJECTORY Mainly impaired side in the inner side of circle		Early-PD vs HC											GEE models (Different stages of PD vs HC) DIRECTION OF CIRCULAR TRAJECTORY Mainly impaired side in the inner side of circle		Mid-PD vs HC
			TIME			GROUP			TIME x GROUP			Confounders				TIME			GROUP			TIME x GROUP			Confounders
			Beta	SE	p	Beta	SE	p	Beta	SE	p					Beta	SE	p	Beta	SE	p	Beta	SE	p
	FEATURES	Number of steps	0.0158402	0.0118156	0.180046	0.197212	0.190764	0.301229	0.0427447	0.0246566	0.0829888	a		FEATURES	Number of steps	0.0137244	0.00867922	0.113809	0.511921	0.146424	0.000472005	-0.0161269	0.0255293	0.527581	a
		Total duration	-0.00282031	0.0432492	0.948006	0.601095	0.299508	0.0447559	0.108256	0.0565554	0.0555997	b*			Total duration	-0.0380229	0.0270189	0.159347	0.693741	0.25266	0.00603737	0.0761233	0.0860891	0.376568	b*
		Asymmetry of step time	0.00443549	0.0492787	0.928281	-0.155765	0.298977	0.602372	0.0251509	0.0928606	0.78651	a/b			Asymmetry of step time	-0.00297282	0.0523446	0.95471	0.143708	0.253882	0.571364	0.0977543	0.0785471	0.213304	a/b
		Median stride time	-0.00185861	0.0178945	0.917276	-0.323928	0.276682	0.241695	-0.0907892	0.0342255	0.00798556	a			Median stride time	-0.0171324	0.0291464	0.556663	-0.354843	0.261545	0.174869	-0.0605208	0.0547325	0.268832	a/b
		Stride time variability	-0.0310061	0.0629505	0.622333	0.241904	0.260887	0.353804	-0.0378746	0.0915255	0.67901	a			Stride time variability	-0.0554298	0.059476	0.351352	-0.269917	0.267554	0.313054	0.218014	0.0768496	0.00455545	a/b/c
		SD (VT)	0.0131779	0.0119824	0.271429	-0.125288	0.194155	0.518733	0.00362894	0.0250376	0.884759	a			SD (VT)	0.0259379	0.0202661	0.200592	-0.439939	0.208026	0.0344445	0.0137874	0.0278712	0.620825	a/b		Legend of confounders
		SD (ML)	0.0533249	0.0350607	0.128278	0.011589	0.274113	0.966277	0.0225651	0.0407392	0.579654	a/b			SD (ML)	0.0508893	0.0350598	0.14664	-0.0546925	0.220347	0.803972	-0.0143674	0.0514905	0.780222	a/b		a	Gait speed
		SD (AP)	0.0498407	0.0189038	0.00837565	-0.183993	0.221704	0.406593	-0.00136134	0.0333263	0.967416	a/c			SD (AP)	0.0717039	0.0209289	0.000612381	-0.558747	0.193496	0.0038814	0.0338429	0.0357813	0.344238	a/b/c		b	Age
		Stride regularity (VT)	-0.0757051	0.0366211	0.0387102	-0.364952	0.258878	0.158614	-0.0470877	0.0649011	0.468127	b			Stride regularity (VT)	-0.0487173	0.0338774	0.15042	0.372734	0.215366	0.0835048	-0.132083	0.0664301	0.046779	a/b/c		c	ON/OFF medication stage
		Step regularity (VT)	-0.204024	0.168456	0.22584	-0.186791	0.21344	0.381493	0.142457	0.162624	0.381036	b/c			Step regularity (VT)	-0.167203	0.159235	0.2937	-0.280523	0.200418	0.161606	0.160323	0.161311	0.320284	a
		Stride regularity (AP)	-0.0750688	0.0263383	0.00436957	-0.699722	0.269467	0.00941267	-0.0331195	0.0678498	0.625458				Stride regularity (AP)	-0.0756597	0.0347181	0.0293125	-0.425036	0.287417	0.13919	-0.123802	0.0581169	0.033153	b/c
		Step regularity (AP)	-0.142651	0.0848972	0.0929021	-0.221001	0.244373	0.365804	0.0231439	0.0864074	0.788818	b			Step regularity (AP)	-0.146114	0.117869	0.215111	-0.49685	0.260705	0.0566769	0.159513	0.130064	0.22004			Legend of colors
		Harmonic ratio (VT)	0.0135411	0.0294246	0.645375	-0.319495	0.307976	0.299549	-0.0496893	0.0475178	0.295701	b			Harmonic ratio (VT)	0.0495915	0.0265012	0.0613048	-0.528745	0.266478	0.0472336	-0.0911126	0.0386479	0.0183982	a		Results
		Harmonic ratio (ML)	-0.052638	0.0238697	0.0274384	-0.0993357	0.263696	0.706392	-0.113346	0.0417387	0.00661548				Harmonic ratio (ML)	-0.0091317	0.0291228	0.753856	-0.329777	0.262477	0.20897	0.0889691	0.0732342	0.224421	a/b			Significant results with p < .05
		Harmonic ratio (AP)	-0.0880003	0.0375262	0.0190251	-0.598584	0.291454	0.0399965	-0.0197893	0.0555577	0.721696	b			Harmonic ratio (AP)	-0.0484543	0.0393701	0.21842	-0.992713	0.286132	0.000521576	0.121614	0.0773436	0.115861	a		Criteria for progression markers
		Index of harmonicity (VT)	0.066494	0.0513208	0.195095	0.737776	0.280947	0.00863856	-0.180147	0.0705332	0.0106471	b			Index of harmonicity (VT)	0.0425784	0.0479779	0.374832	0.897872	0.29424	0.00227703	-0.0819855	0.0656341	0.211618	a/b/c			Significant results with p < .05 (expected direction)
		Index of harmonicity (ML)	-0.00299115	0.0531427	0.955115	0.208822	0.279168	0.45445	0.0436246	0.06365	0.493102	a			Index of harmonicity (ML)	-0.00116419	0.0580278	0.983993	-0.0749921	0.298731	0.801787	-0.0574007	0.0777416	0.460301	a			Significant results with p < .05 (unexpected direction)
		Index of harmonicity (AP)	-0.0420067	0.0353102	0.234185	-0.0407675	0.326457	0.90062	0.0909678	0.0722346	0.207908	a/c			Index of harmonicity (AP)	-0.0743796	0.0380638	0.050692	0.313082	0.267888	0.242521	-0.0162386	0.0478921	0.73456	a/b			Results with trend, p < .1 (expected direction)
		Normalized peak power (VT)	-6.95261e-05	0.0612391	0.999094	0.281531	0.283527	0.320729	-0.149235	0.078054	0.0558829	b			Normalized peak power (VT)	0.00267111	0.0568592	0.962531	0.386337	0.238602	0.105411	-0.139436	0.0698499	0.0459097	a/b			Results with trend, p < .1 (unexpected direction)
		Normalized peak power (ML)	-0.0409894	0.0465874	0.378946	-0.416555	0.302668	0.168736	-0.0473003	0.0581509	0.415986				Normalized peak power (ML)	0.0189626	0.0512751	0.711517	-0.255611	0.265154	0.33504	-0.00827785	0.0808009	0.918401	a/b			Results with trend, p < .05 (opposite direction from Early-PD vs HC)
		Normalized peak power (AP)	-0.0965992	0.0311007	0.0018963	-0.514099	0.276822	0.063291	-0.056317	0.0692864	0.416324				Normalized peak power (AP)	-0.113091	0.0364104	0.0018963	-0.269623	0.264545	0.308111	-0.0432906	0.0649348	0.504978				Results with trend, p < .1 (opposite direction from Early-PD vs HC)
		Width of peak power (VT)	-0.00610415	0.0376429	0.87118	0.48795	0.203061	0.0162625	0.0716538	0.0812575	0.377879	a			Width of peak power (VT)	-0.00426983	0.0336244	0.898952	0.440869	0.227761	0.0529084	0.0930135	0.0839831	0.268067	a
		Width of peak power (ML)	0.109798	0.0916018	0.230667	0.346659	0.168448	0.039594	-0.0593263	0.111485	0.594624				Width of peak power (ML)	0.129337	0.107903	0.230667	0.539254	0.215576	0.0123685	-0.161242	0.12584	0.20008	c
		Width of peak power (AP)	0.0256511	0.0285689	0.369255	0.594	0.273891	0.030102	-0.080317	0.0881046	0.361974	c			Width of peak power (AP)	0.0402497	0.046739	0.389151	-0.147446	0.281411	0.600311	0.106417	0.0931162	0.253103	a

## Sheet: Table B.5 Lat. affected outside
	GEE models (Different stages of PD vs HC) DIRECTION OF CIRCULAR TRAJECTORY Mainly impaired side in the outside of circle		Early-PD vs HC											GEE models (Different stages of PD vs HC) DIRECTION OF CIRCULAR TRAJECTORY Mainly impaired side in the outside of circle		Mid-PD vs HC
			TIME			GROUP			TIME x GROUP			Confounders				TIME			GROUP			TIME x GROUP			Confounders
			Beta	SE	p	Beta	SE	p	Beta	SE	p					Beta	SE	p	Beta	SE	p	Beta	SE	p
	FEATURES	Number of steps	0.018353	0.012282	0.135097	0.20541	0.20355	0.31291	0.0511246	0.0241879	0.0345458	a		FEATURES	Number of steps	0.0145325	0.00910099	0.110309	0.500541	0.148426	0.000745332	-0.0164431	0.0287322	0.567126	a
		Total duration	-0.00690213	0.0449308	0.877912	0.637777	0.299398	0.0331554	0.125302	0.0583853	0.031864	b*			Total duration	-0.0399063	0.02691	0.138087	0.74278	0.23734	0.00175038	0.0742857	0.0893324	0.405654	b*
		Asymmetry of step time	-0.00147226	0.0485123	0.975789	-0.0476566	0.287559	0.868371	0.0561861	0.0902547	0.533595	a/b			Asymmetry of step time	-0.032014	0.0468072	0.494004	0.526142	0.242879	0.0302901	-0.0462932	0.0948204	0.625394	a
		Median stride time	-0.00489231	0.0178262	0.783742	-0.339801	0.287688	0.237547	-0.105632	0.0324903	0.0011492	a			Median stride time	-0.0245736	0.0299384	0.411757	-0.264627	0.264907	0.317823	-0.0356561	0.0578352	0.537556	a/b
		Stride time variability	-0.0322091	0.0645419	0.61775	0.292959	0.288675	0.310182	-0.0249205	0.0803316	0.756393	a			Stride time variability	-0.026218	0.0619396	0.672088	-0.029922	0.262791	0.909347	0.126599	0.0934077	0.175311	a
		SD (VT)	0.0144844	0.0119982	0.227351	-0.146127	0.200238	0.465534	0.0180886	0.0231457	0.434502	a			SD (VT)	0.0323128	0.0212466	0.128298	-0.510629	0.217643	0.018967	0.0129149	0.0273691	0.637013	a/b		Legend of confounders
		SD (ML)	0.0555456	0.0358263	0.121042	-0.0204658	0.272987	0.940239	0.0395993	0.0416666	0.341916	a/b			SD (ML)	0.0580895	0.0355761	0.102505	-0.149949	0.218738	0.493018	-0.0207613	0.0492915	0.673614	a/b		a	Gait speed
		SD (AP)	0.0503077	0.0190768	0.00836152	-0.161791	0.224455	0.471024	0.0064085	0.0381384	0.866558	a/c			SD (AP)	0.0781207	0.0219389	0.000369673	-0.606629	0.191182	0.00150854	0.0383053	0.039275	0.329407	a/b		b	Age
		Stride regularity (VT)	-0.0488009	0.0343942	0.155938	-0.441924	0.281082	0.115899	-0.0548948	0.0635946	0.388027				Stride regularity (VT)	-0.0552713	0.0346781	0.110973	0.393558	0.21013	0.0610783	-0.153712	0.0751429	0.0407956	a/b/c		c	ON/OFF medication stage
		Step regularity (VT)	-0.202524	0.168427	0.229191	-0.135918	0.203769	0.504757	0.134	0.161213	0.405864	b			Step regularity (VT)	-0.169281	0.158364	0.285099	-0.327542	0.19056	0.0856443	0.146022	0.16347	0.371715
		Stride regularity (AP)	-0.0868389	0.0242999	0.000352058	-0.913844	0.295165	0.0019612	-0.0380576	0.0696751	0.584918	a			Stride regularity (AP)	-0.100363	0.035213	0.00436957	-0.656285	0.279688	0.0189514	-0.152012	0.070527	0.0311323
		Step regularity (AP)	-0.139531	0.0805378	0.0831853	-0.399713	0.272361	0.142216	0.0385806	0.0839111	0.645675	a/b			Step regularity (AP)	-0.146859	0.11847	0.215111	-0.447842	0.255945	0.0801601	0.127525	0.131347	0.331596			Legend of colors
		Harmonic ratio (VT)	0.0148401	0.0288242	0.606658	-0.0119991	0.319958	0.970085	-0.155975	0.0489485	0.00143997	a/b			Harmonic ratio (VT)	0.0494927	0.0263992	0.0608234	-0.525241	0.263157	0.0459424	-0.127419	0.0696042	0.0671566	a		Results
		Harmonic ratio (ML)	-0.0510861	0.0231659	0.0274384	-0.00974987	0.278866	0.97211	-0.143313	0.0600559	0.0170176				Harmonic ratio (ML)	-0.00213496	0.0320843	0.946946	-0.397092	0.274585	0.148134	0.0226305	0.0598737	0.705453	b/c			Significant results with p < .05
		Harmonic ratio (AP)	-0.0849611	0.0374512	0.0232939	-0.458725	0.287331	0.110376	-0.141906	0.0626382	0.0234832	b			Harmonic ratio (AP)	-0.0666772	0.0390129	0.0874318	-0.843123	0.256589	0.00101662	0.0032208	0.0618033	0.958438	a/b		Criteria for progression markers
		Index of harmonicity (VT)	0.10089	0.0479037	0.0351957	0.730027	0.2845	0.0102877	-0.194249	0.0843257	0.0212474				Index of harmonicity (VT)	0.0495625	0.0496541	0.318204	0.980417	0.281135	0.000487832	-0.124281	0.0679394	0.067355	a/b			Significant results with p < .05 (expected direction)
		Index of harmonicity (ML)	-0.00344273	0.0538913	0.949064	0.185223	0.285908	0.517088	0.0396217	0.0634955	0.532623	a			Index of harmonicity (ML)	-0.000383445	0.0613111	0.99501	0.149924	0.288245	0.602975	-0.0909671	0.0801914	0.256637	a			Significant results with p < .05 (unexpected direction)
		Index of harmonicity (AP)	-0.0445773	0.0364432	0.221254	-0.137567	0.316071	0.663389	0.0897885	0.0772924	0.245369	a/c			Index of harmonicity (AP)	-0.0825161	0.0384229	0.0317476	0.440487	0.25554	0.0847527	0.0261116	0.0435533	0.548817	b			Results with trend, p < .1 (expected direction)
		Normalized peak power (VT)	0.00758061	0.0673702	0.91041	0.299478	0.270022	0.267392	-0.196281	0.0840888	0.0195844	b			Normalized peak power (VT)	0.00832692	0.0574122	0.884681	0.44684	0.233538	0.055703	-0.154798	0.0689464	0.0247558	a/b			Results with trend, p < .1 (unexpected direction)
		Normalized peak power (ML)	-0.0385239	0.0437852	0.378946	-0.420871	0.288552	0.144686	-0.0511969	0.0572599	0.37126				Normalized peak power (ML)	0.0280881	0.0476866	0.555852	-0.495135	0.248094	0.0459599	0.0299618	0.0865019	0.729063	b			Results with trend, p < .05 (opposite direction from Early-PD vs HC)
		Normalized peak power (AP)	-0.100431	0.0287813	0.000484019	-0.649138	0.281927	0.0213069	-0.0785986	0.0558929	0.159654	a			Normalized peak power (AP)	-0.11251	0.0362233	0.0018963	-0.316486	0.265361	0.233002	-0.0394381	0.0694305	0.570019				Results with trend, p < .1 (opposite direction from Early-PD vs HC)
		Width of peak power (VT)	-0.000850276	0.0393854	0.982776	0.914074	0.216677	2.45818e-05	0.0224277	0.0699075	0.748347				Width of peak power (VT)	-0.0298877	0.0311323	0.337044	0.87258	0.162989	8.62088e-08	0.0240695	0.0736017	0.74365	b
		Width of peak power (ML)	0.0892653	0.074472	0.230667	0.402205	0.197157	0.0413475	-0.0383554	0.0953262	0.687419				Width of peak power (ML)	0.0912736	0.091035	0.316044	0.55118	0.232494	0.017753	-0.072097	0.115777	0.533467	a/b
		Width of peak power (AP)	0.0215187	0.0239664	0.369255	0.43603	0.218956	0.0464362	-0.058307	0.0717463	0.4164				Width of peak power (AP)	0.0301934	0.0336279	0.369255	-0.210035	0.235289	0.372036	0.155374	0.0895188	0.0826236	c
